# Supplementary material
Source: PubMed Central journal article supplement (PMC1446085)

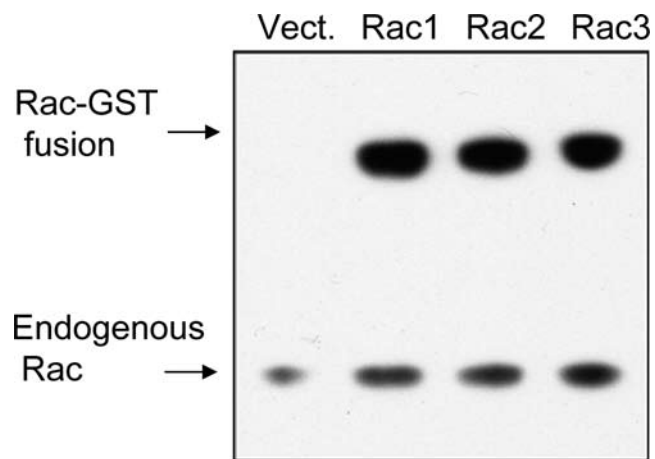

Supplemental Figure 1

Supplement: mbc_E05-10-0955_1.pdf [file mbc_E05-10-0955_1.pdf]
